# Supplementary material for: A supported manganese complex with amine-bis(phenol) ligand for catalytic benzylic C(sp3)–H bond oxidation
Source: Royal Society of Chemistry journal article supplement (doi:10.1039/c9ra02284h), 2019-01-01
Supplement: c9ra02284h1.pdf [file c9ra02284h1.pdf]

# Supporting Information

## **A supported manganese complex with amine-bis(phenol) ligand for catalytic benzylic C(SP<sup>3</sup>)-H bond oxidation**

Touraj Karimpour,<sup>a</sup> Elham Safaei,<sup>\*b</sup> Babak Karimi<sup>a</sup>

<sup>a</sup>. Prof. Dr. B. Karimi, Dr. T. Karimpour, Department of Chemistry, Institute for Advanced Studies in Basic Sciences (IASBS), P.O. Box 45137-66731, Gava Zang, Zanjan (Iran)

<sup>b</sup>. Dr. E. Safaei, Department of Chemistry, College of Sciences, Shiraz University Shiraz, 71454, Iran, E-mail: e.safaei@shirazu.ac.ir

### **General procedure for monitoring in the C-H bond oxidation**

A 5 mL glass flask was charged with catalyst (0.04 g, 2 mol%), ethylbenzene (1 mmol) and TBHP aq. 70% (3 equivalents) as oxidant. The process of reaction was monitored as a function of time at 60 °C up to 10 h in solvent free condition under argon atmosphere. At each hour, a sample of the reaction mixture was isolated using a syringe and after the extraction with ethyl acetate, the reaction progression was monitored by using of gas chromatography (GC).

### **General procedure for hot filtration test in the C-H bond oxidation**

A 5 mL glass flask was charged with catalyst (0.04 g, 2 mol%), ethylbenzene (1 mmol) and TBHP aq. 70% (3 equivalents) as oxidant. The process of reaction was monitored as a function of time at 60 °C up to 10 h in solvent free condition under argon atmosphere. For hot filtration test, at the half of the reaction time (5 h) the catalyst was magnetically separated by placing a permanent magnet in the reactor wall and the catalyst-free solution was allowed to continue for stirring at the same conditions. To analyze the reaction content, every hour a sample was extracted from the reaction mixture and reaction progressing was checked via gas chromatography (GC).

### **General procedure for recovery of catalyst in the C-H bond oxidation**

A 5 mL glass flask was charged with catalyst (0.04 g, 2 mol%), ethylbenzene (1 mmol) and TBHP aq. 70% (3 equivalents) as oxidant. The reaction mixture was continuously stirred at 60 °C for the desired time and the reaction was monitored by TLC, after completion of the reaction, anisole (1 mmol, 1/1 substrate and anisole) as internal standard was added. In continue, the mixture was extracted with ethyl acetate and then the catalyst was magnetically recovered by placing a permanent magnet in the reactor wall. Products were collected with a syringe and analyzed by gas chromatography (GC). The catalyst was washed several times with ethanol and acetone and then dried at 80 °C overnight before being used again for the next reaction. The next reaction was checked at the presence of recovery catalyst.

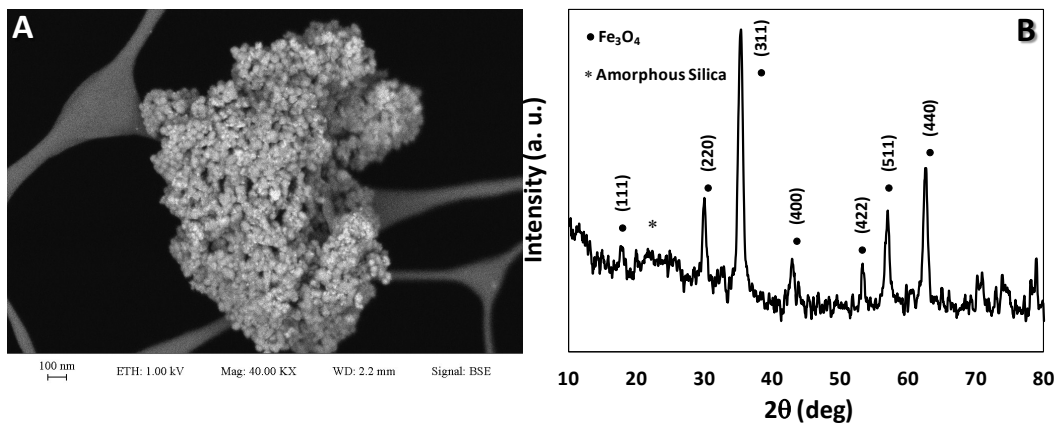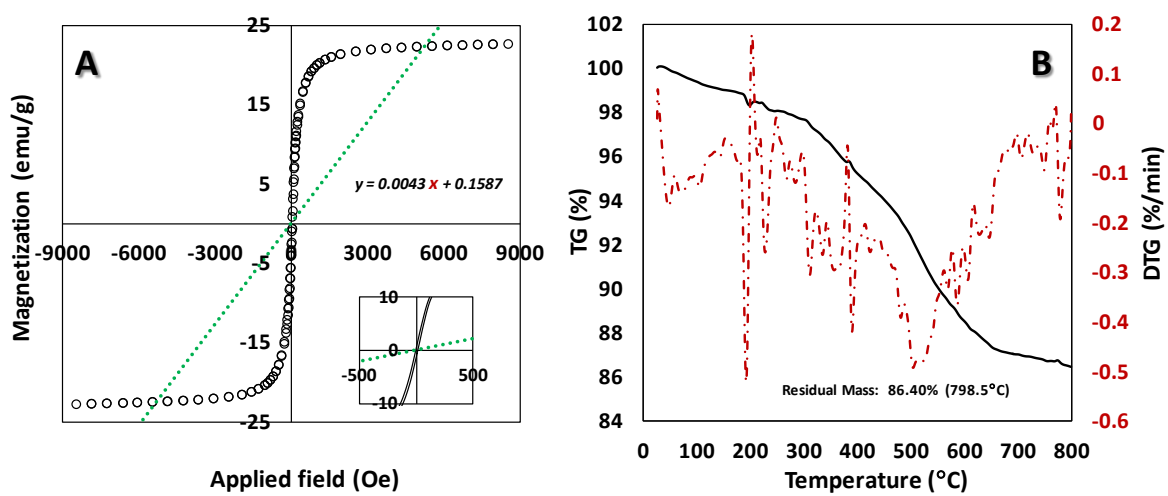

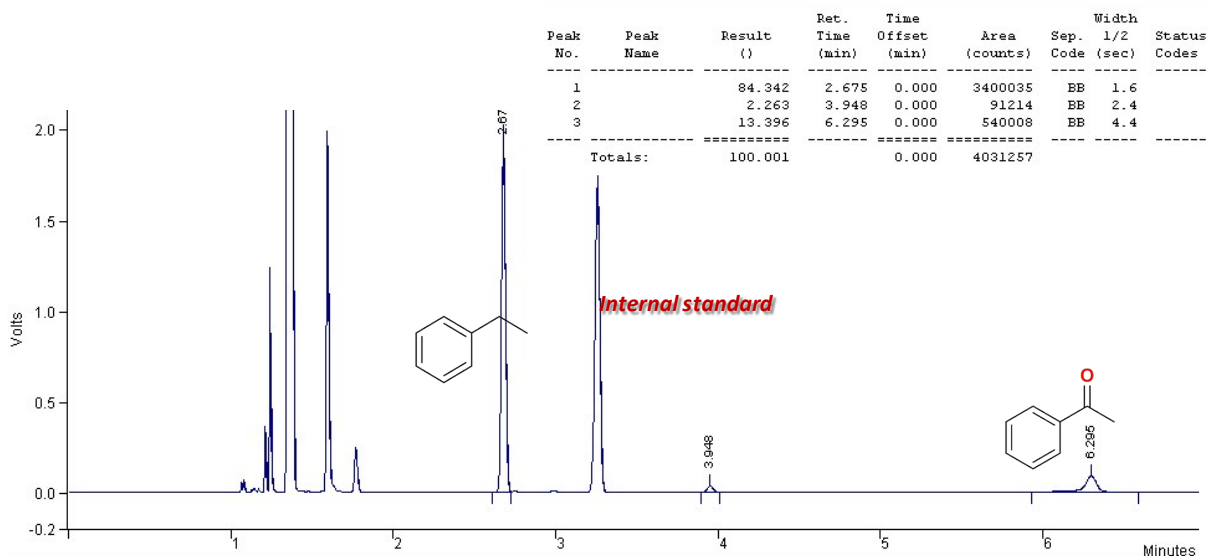

Figure S-3. GC chromatogram for Oxidation of ethylbenzene (Table 1, Entry 1).

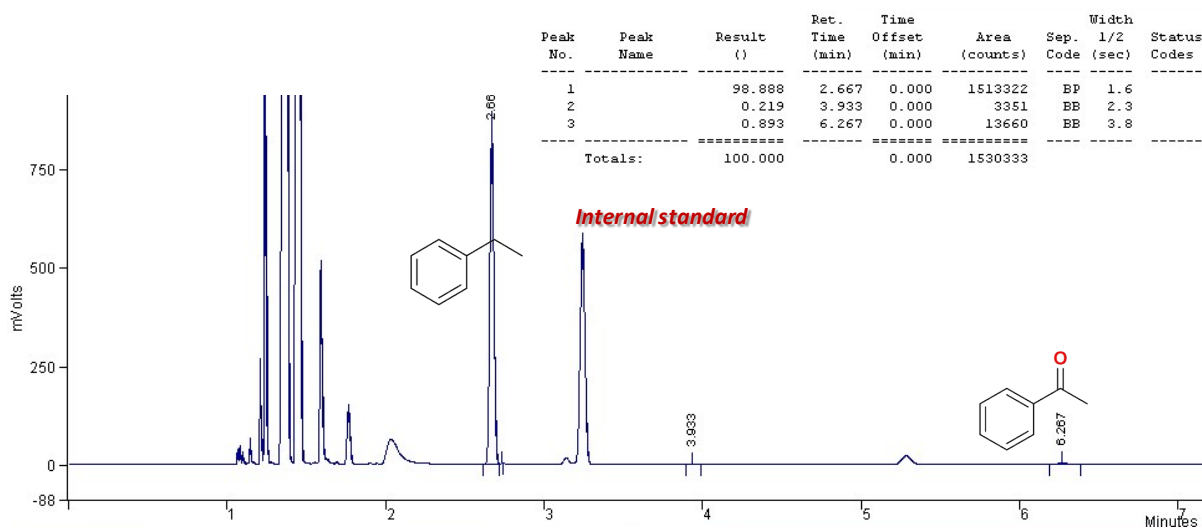

Figure S-4. GC chromatogram for Oxidation of ethylbenzene (Table 1, Entry 2).

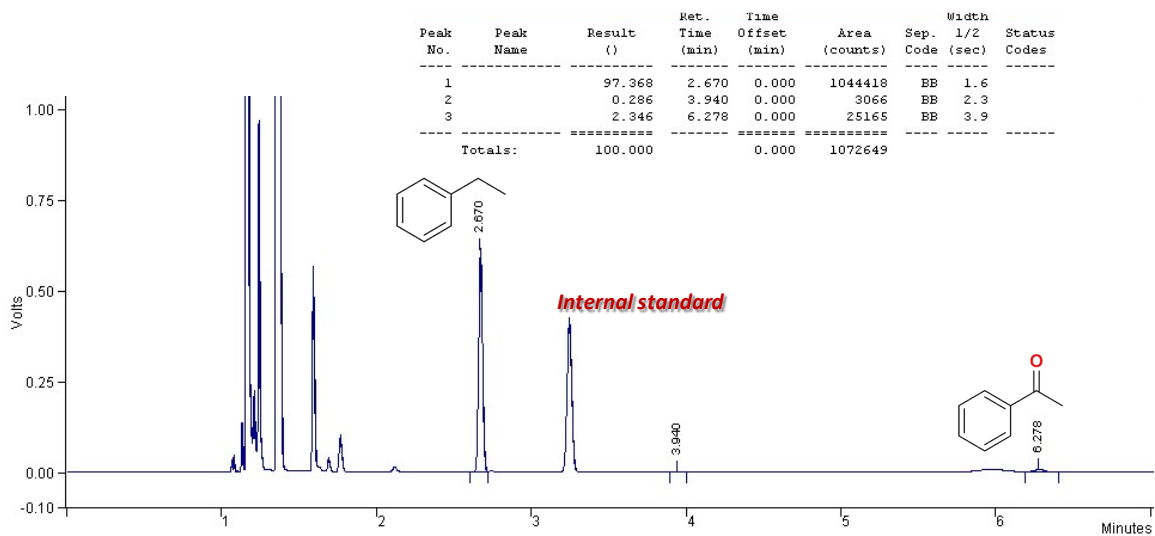

Figure S-5. GC chromatogram for Oxidation of ethylbenzene (Table 1, Entry 3).

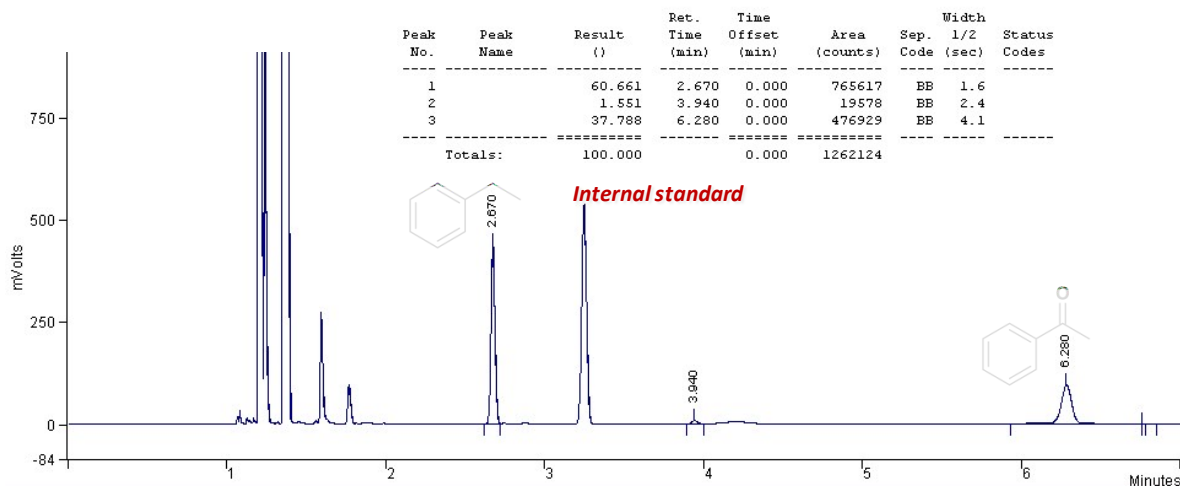

Figure S-6. GC chromatogram for Oxidation of ethylbenzene (Table 1, Entry 4).

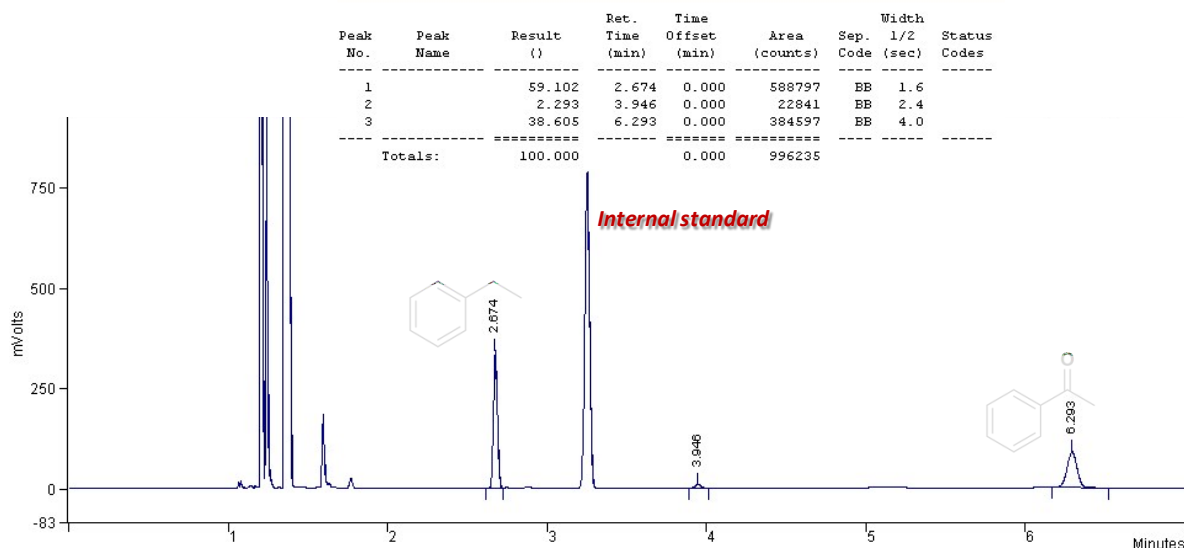

Figure S-7. GC chromatogram for Oxidation of ethylbenzene (Table 1, Entry 5).

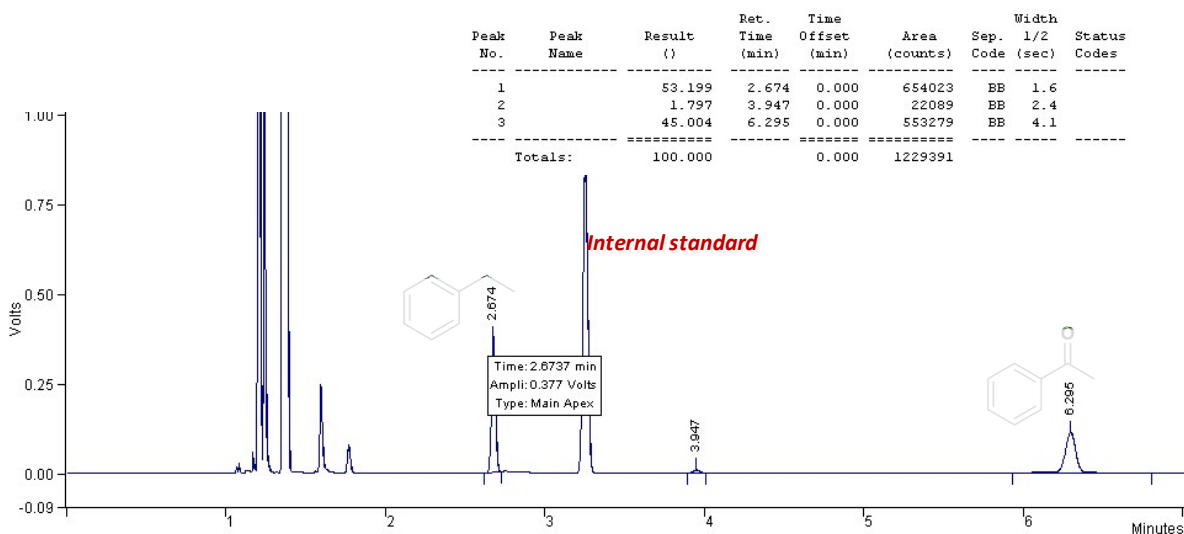

Figure S-8. GC chromatogram for Oxidation of ethylbenzene (Table 1, Entry 6).

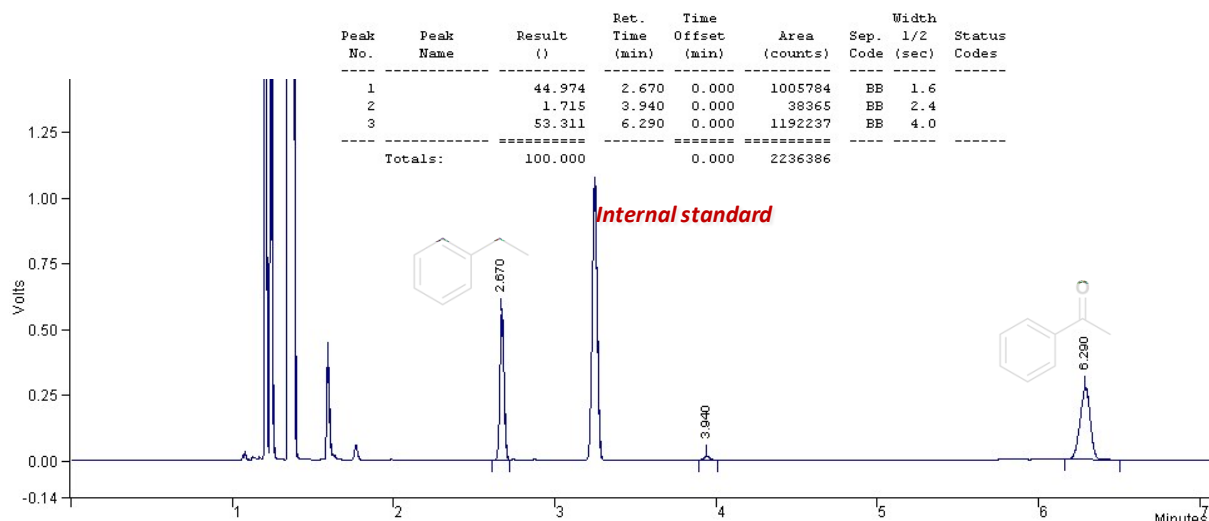

Figure S-9. GC chromatogram for Oxidation of ethylbenzene (Table 1, Entry 7).

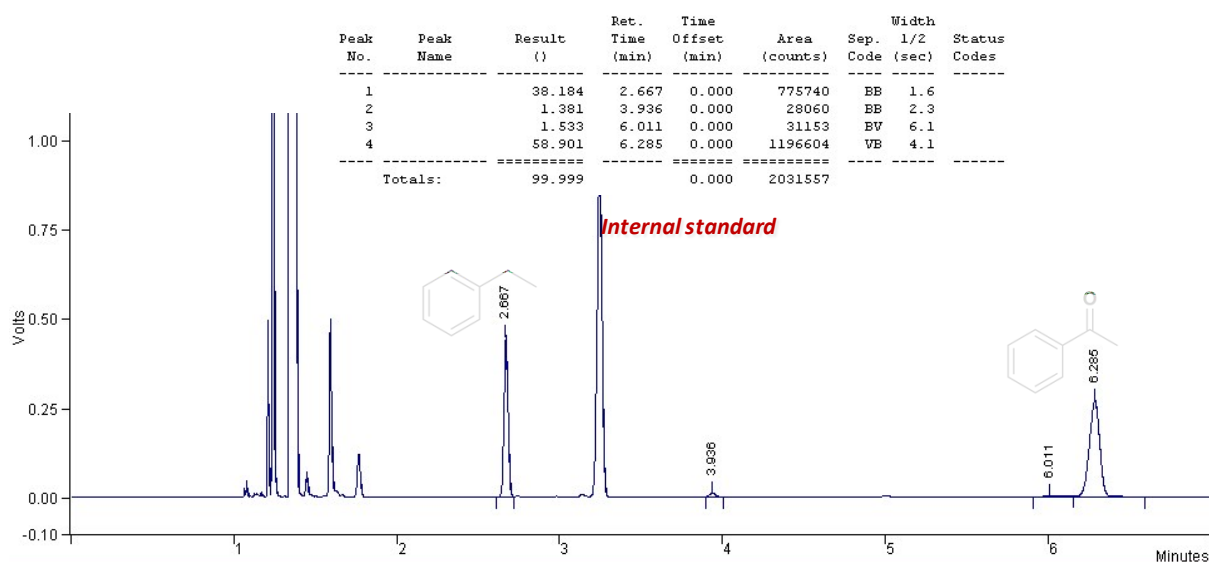

Figure S-10. GC chromatogram for Oxidation of ethylbenzene (Table 1, Entry 8).

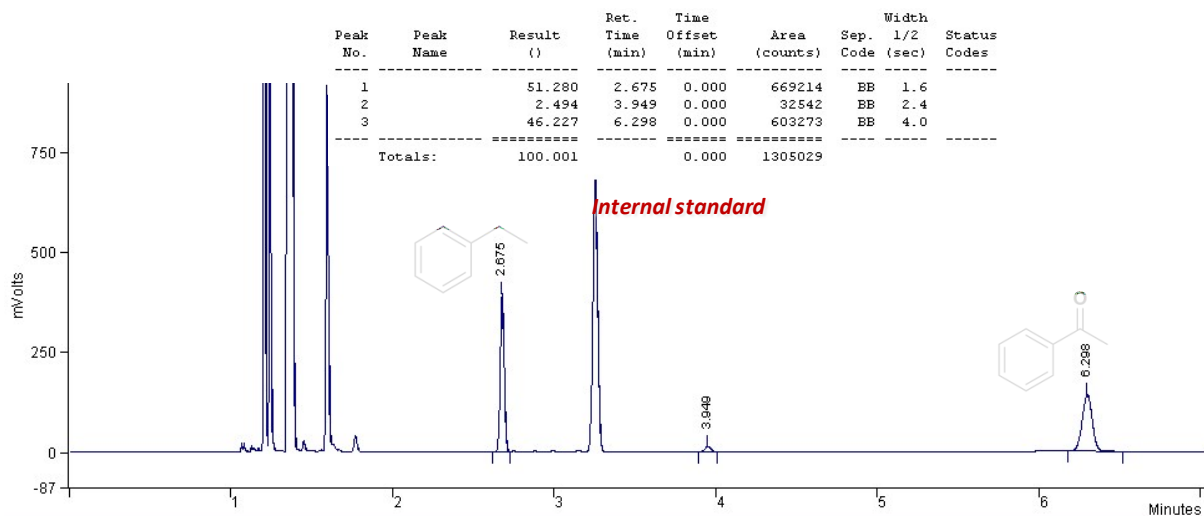

Figure S-11. GC chromatogram for Oxidation of ethylbenzene (Table 1, Entry 9).

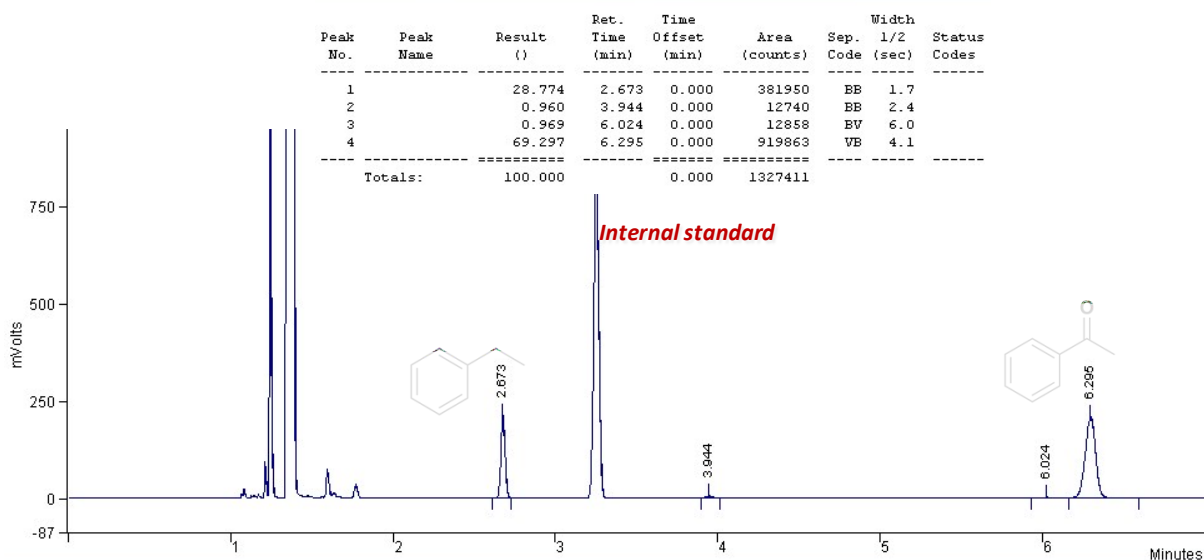

Figure S-12. GC chromatogram for Oxidation of ethylbenzene (Table 1, Entry 10).

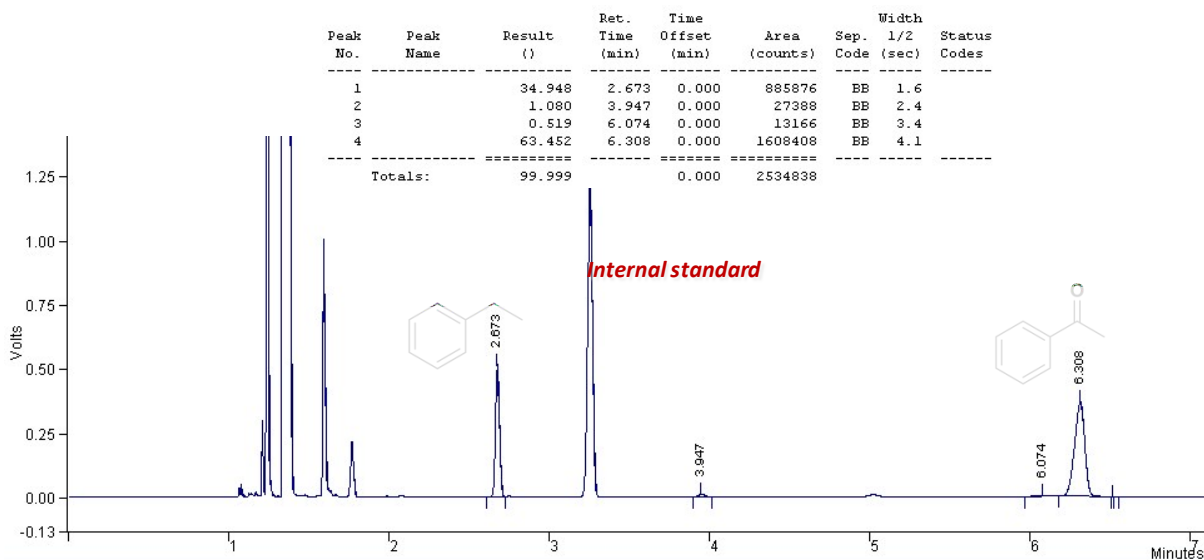

Figure S-13. GC chromatogram for Oxidation of ethylbenzene (Table 1, Entry 11).

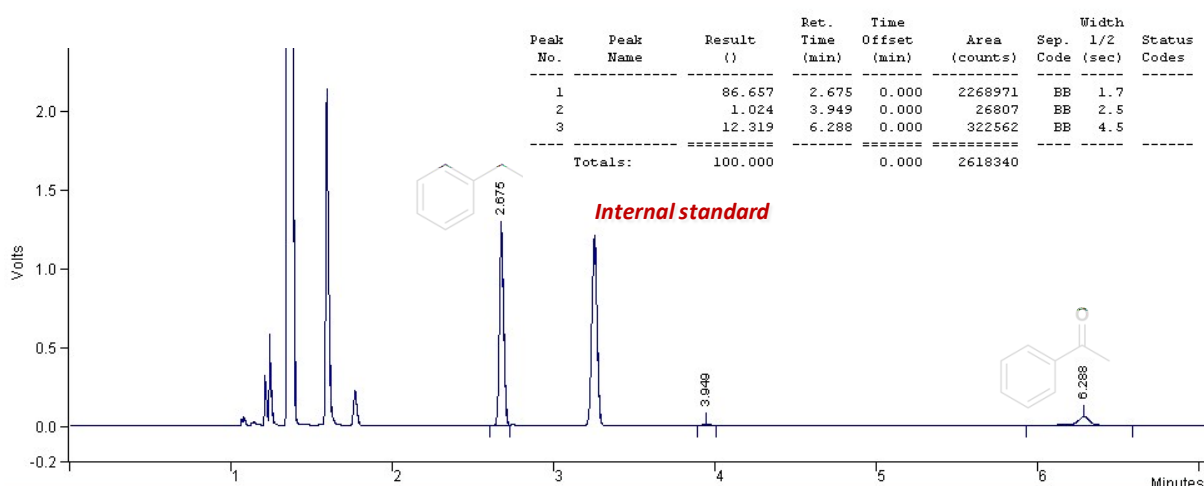

Figure S-14. GC chromatogram for Oxidation of ethylbenzene (Table 1, Entry 12).

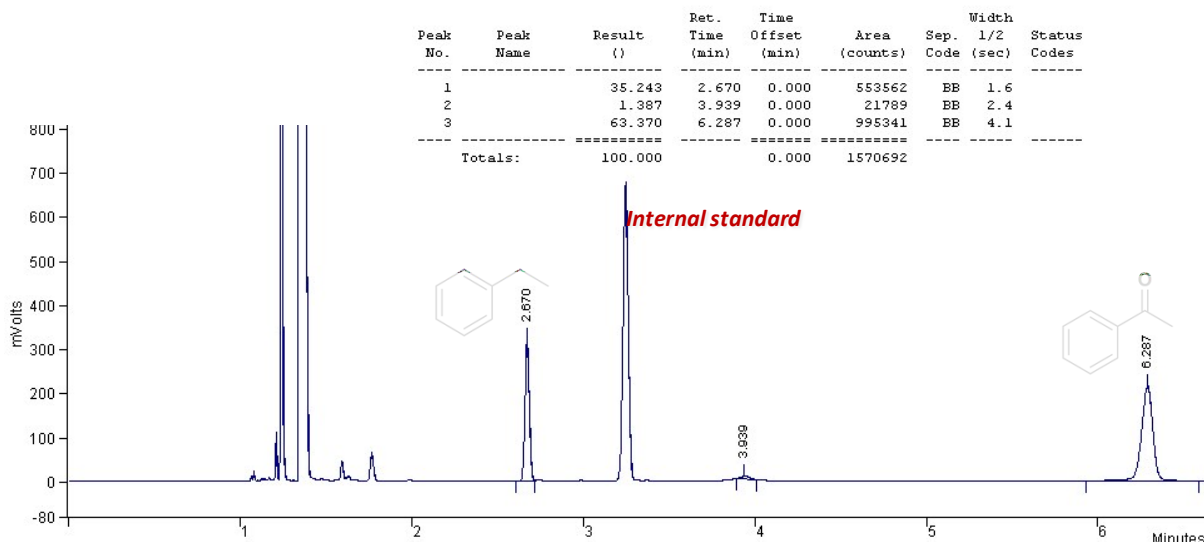

Figure S-15. GC chromatogram for Oxidation of ethylbenzene (Table 1, Entry 13).

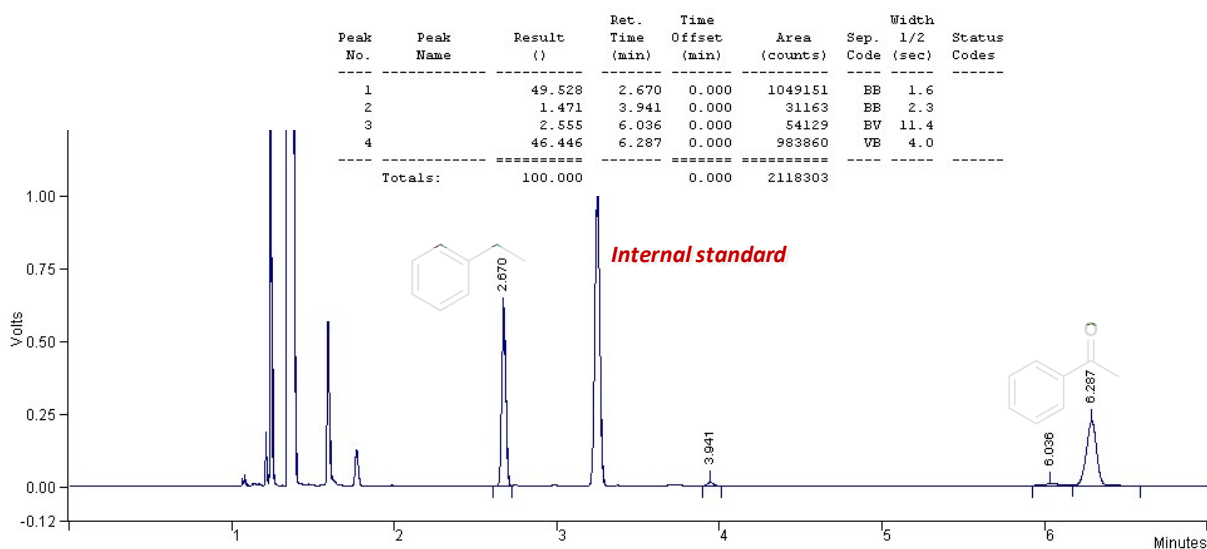

Figure S-16. GC chromatogram for Oxidation of ethylbenzene (Table 1, Entry 14).

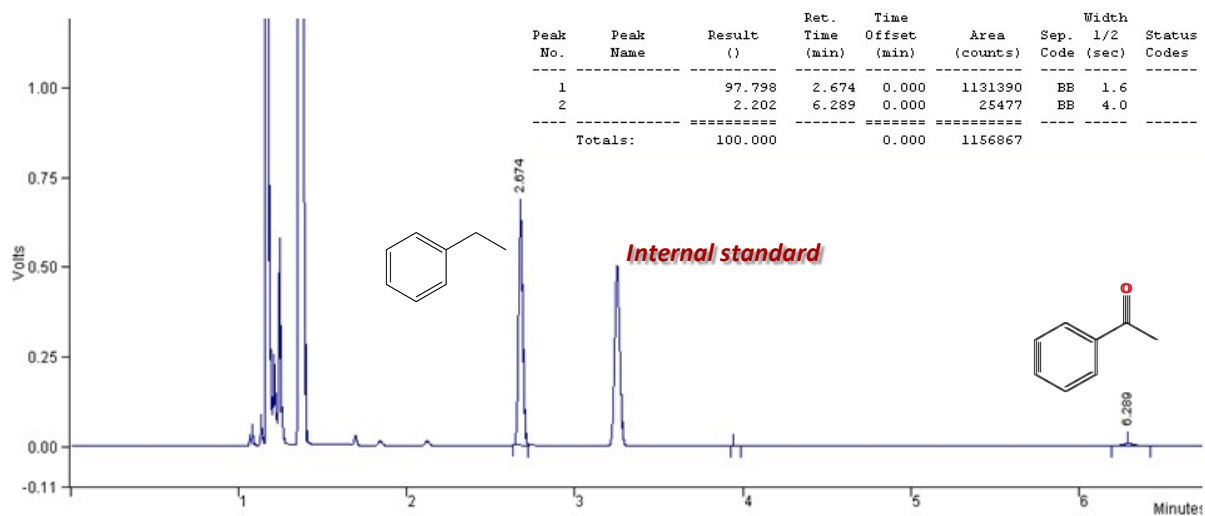

Figure S-17. GC chromatogram for Oxidation of ethylbenzene (Table 1, Entry 15).



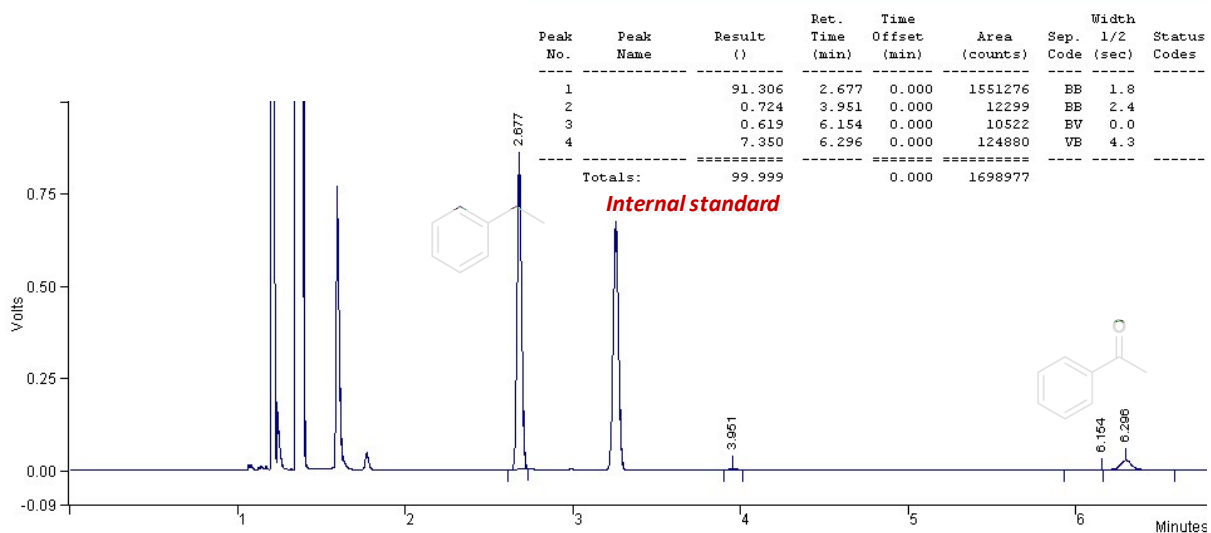

Figure S-18. GC chromatogram for Oxidation of ethylbenzene (Table 1, Entry 16).

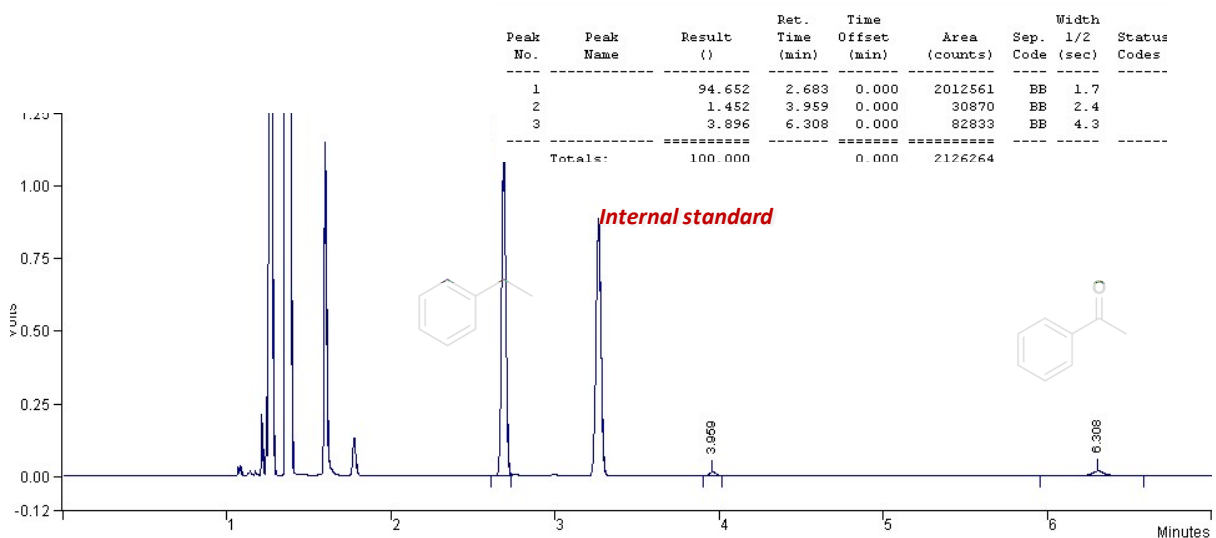

Figure S-19. GC chromatogram for Oxidation of ethylbenzene (Table 1, Entry 17).

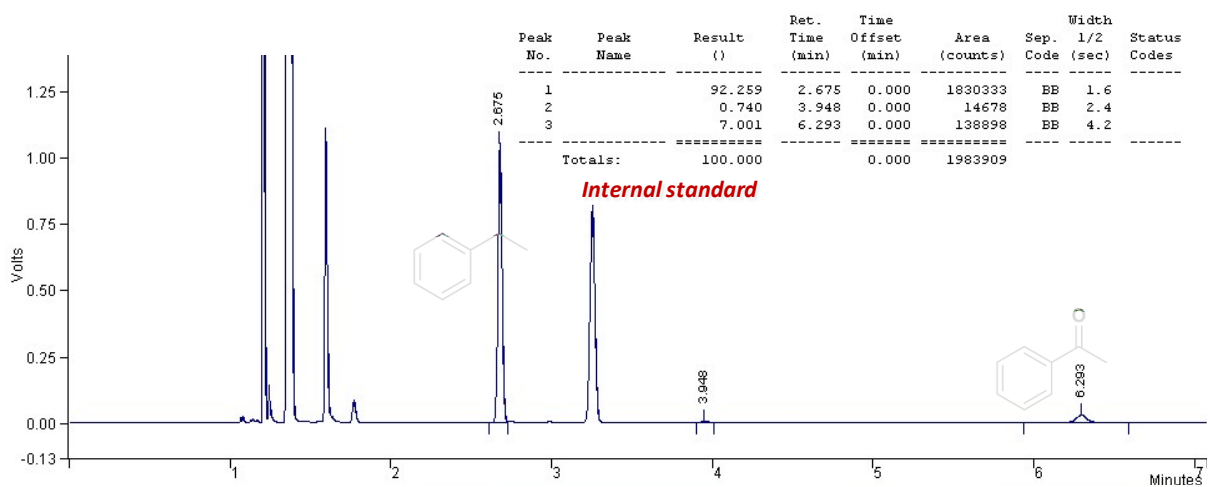

Figure S-20. GC chromatogram for Oxidation of ethylbenzene (Table 1, Entry 18).

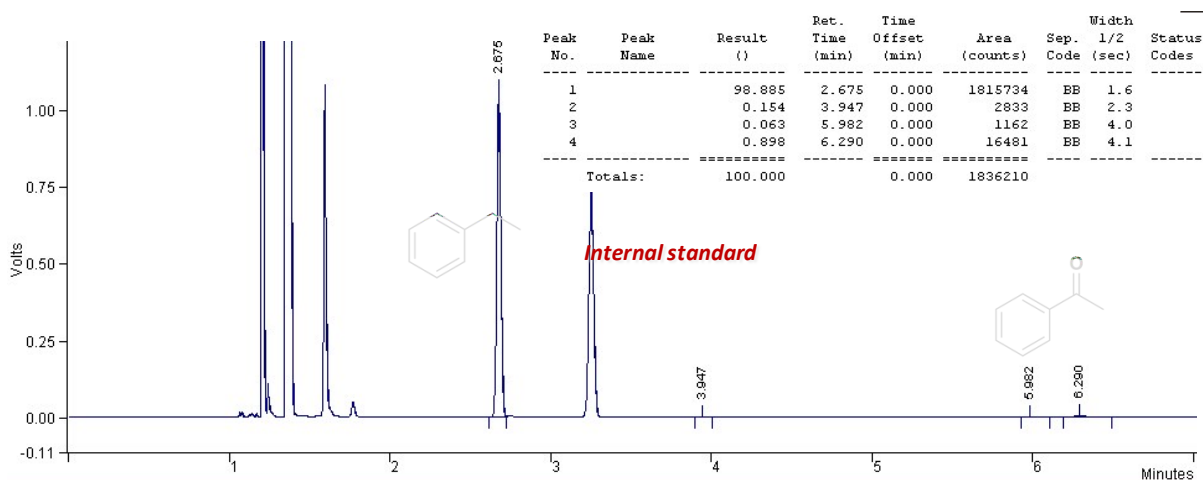

Figure S-21. GC chromatogram for Oxidation of ethylbenzene (Table 1, Entry 19).

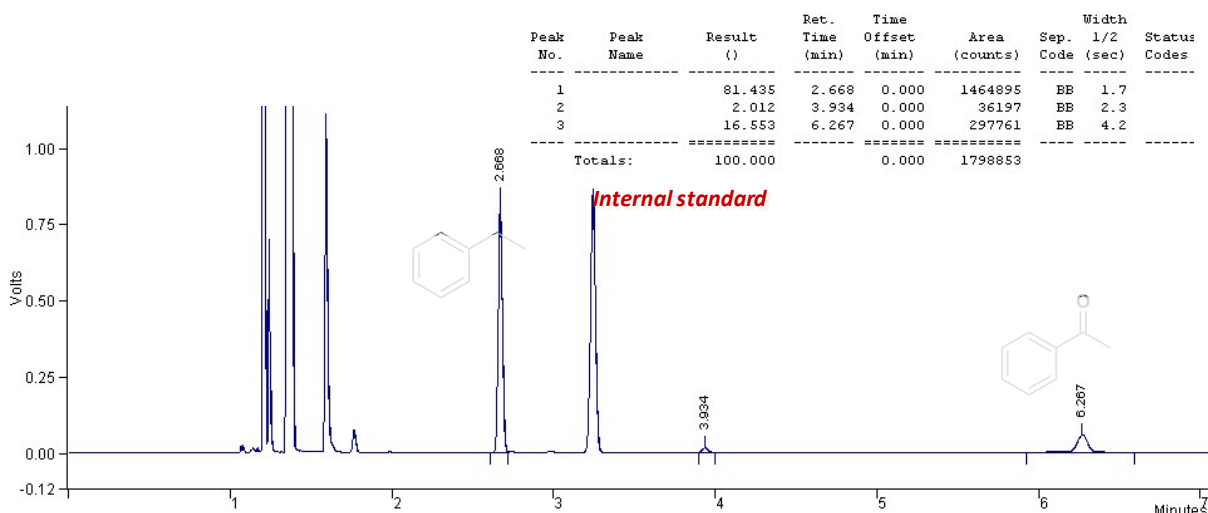

Figure S-22. GC chromatogram for Oxidation of ethylbenzene (Table 1, Entry 20).

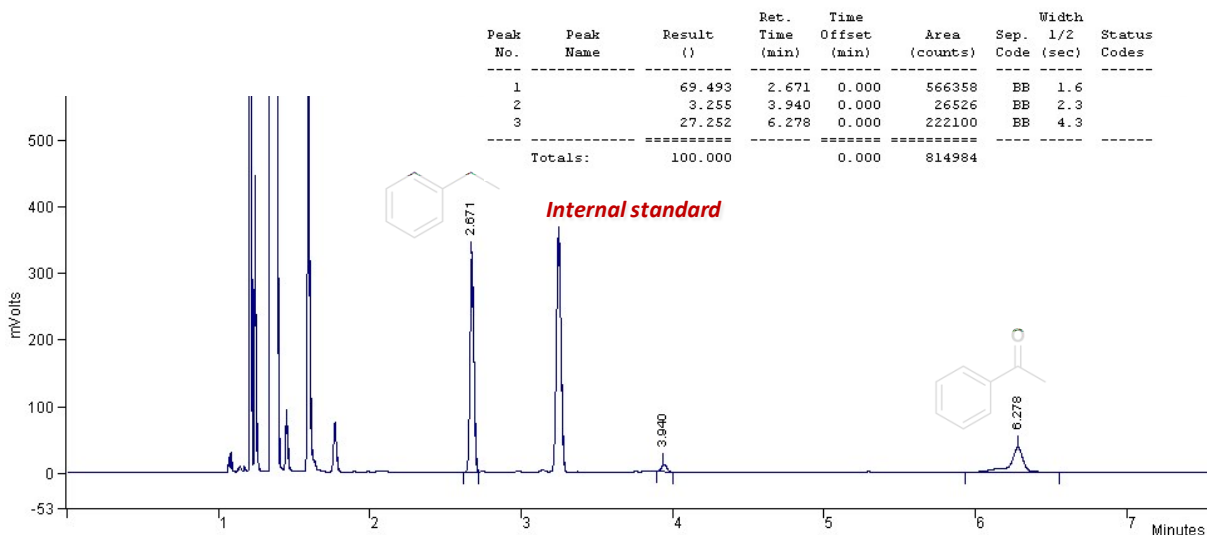

Figure S-23. GC chromatogram for Oxidation of ethylbenzene (Table 1, Entry 21).

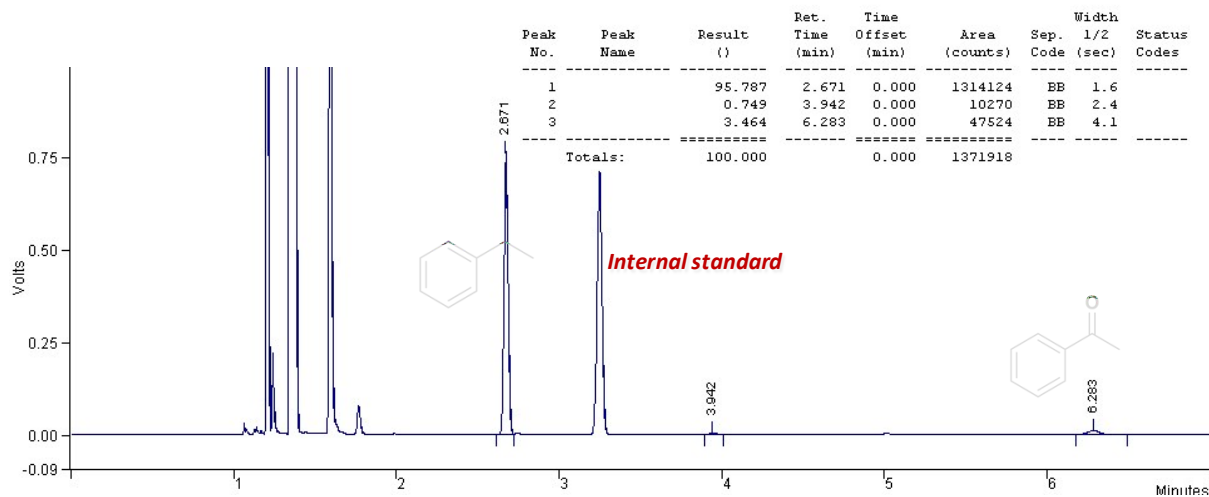

Figure S-24. GC chromatogram for Oxidation of ethylbenzene (Table 1, Entry 22).

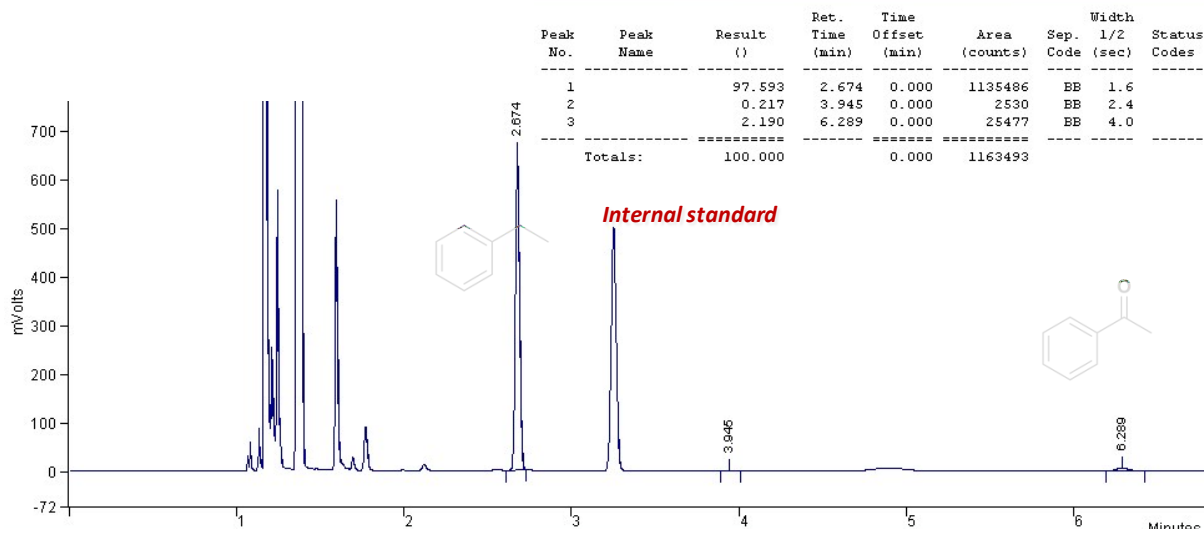

Figure S-25. GC chromatogram for Oxidation of ethylbenzene (Table 1, Entry 23).

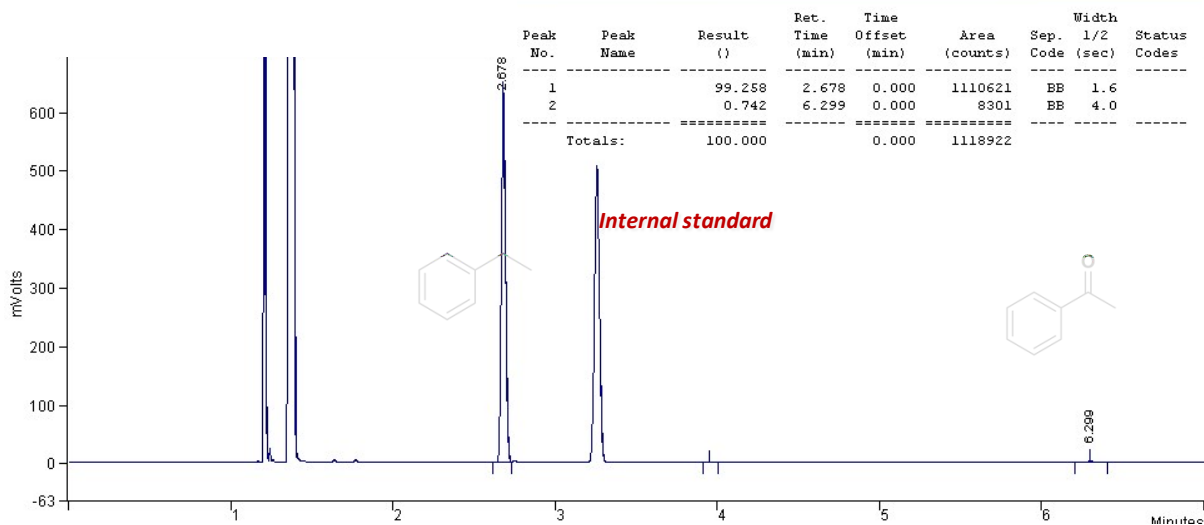

Figure S-26. GC chromatogram for Oxidation of ethylbenzene (Table 1, Entry 24).

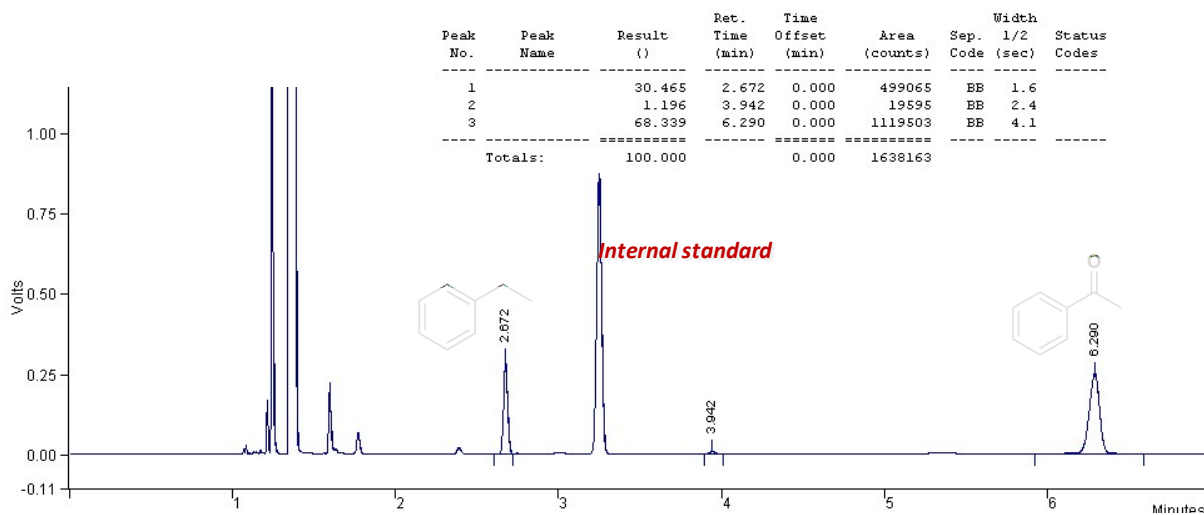

Figure S-27. GC chromatogram for Oxidation of ethylbenzene (Table 1, Entry 25).

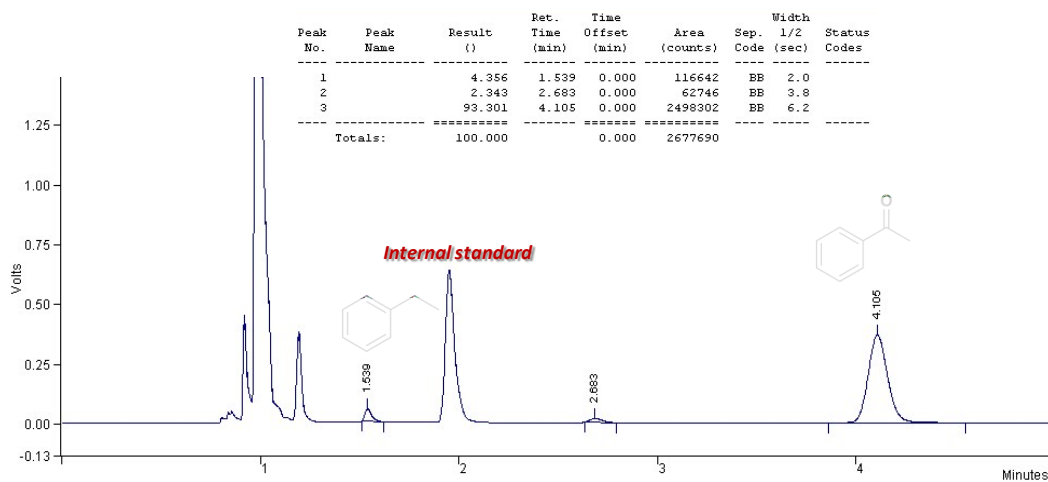

Figure S-28. GC chromatogram for Oxidation of ethylbenzene at the presence of TBHP (Scheme 2-a).

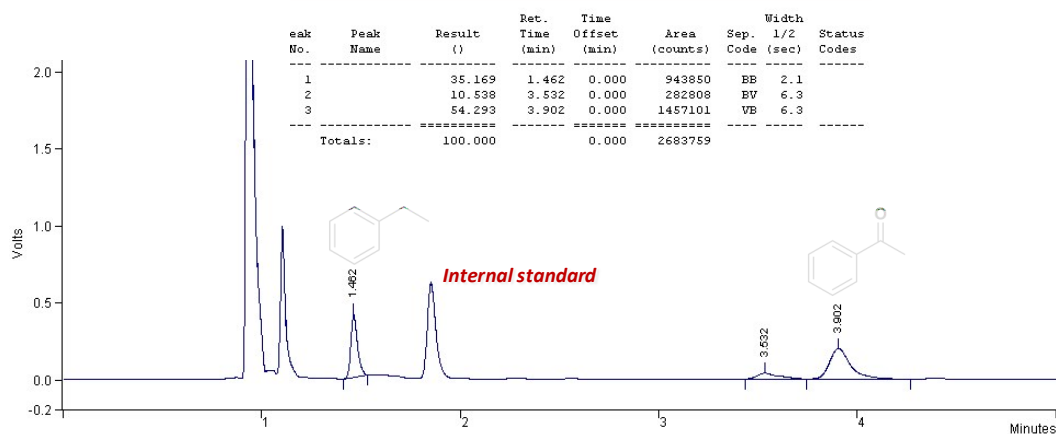

Figure S-29. GC chromatogram for Oxidation of ethylbenzene at the presence of O<sub>2</sub> (Scheme 2-b).

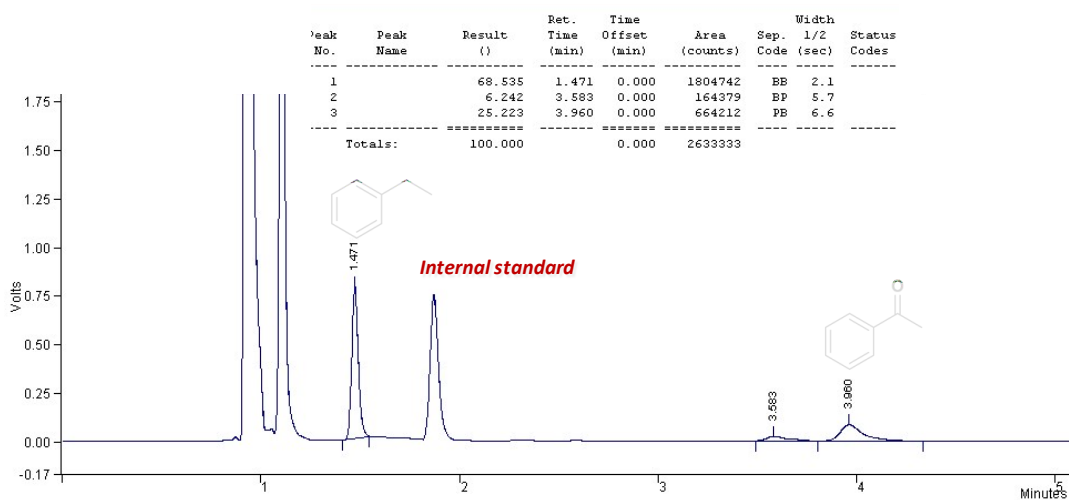

Figure S-30. GC chromatogram for Oxidation of ethylbenzene at the presence of Air (Scheme 2-c).

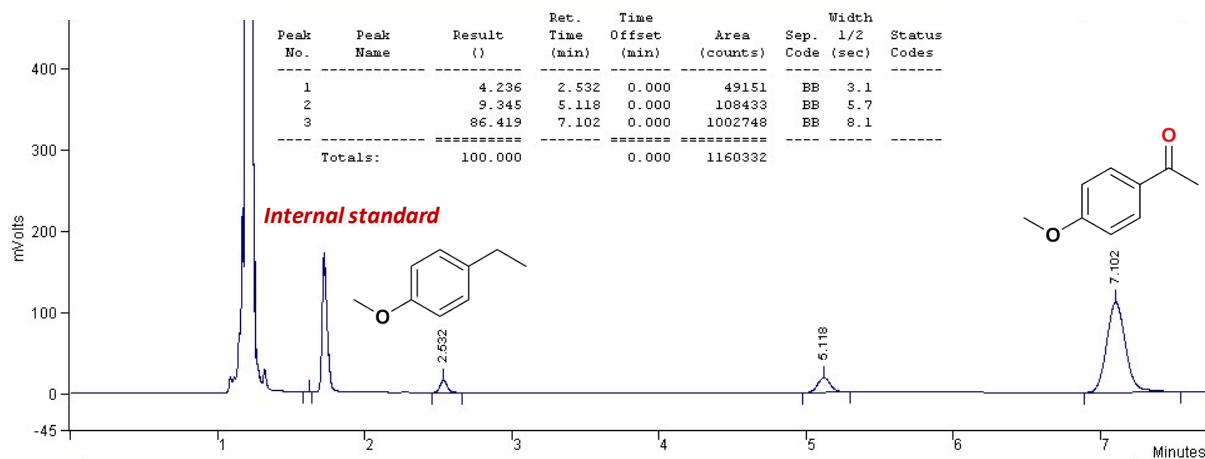

Figure S-31. GC chromatogram for Oxidation of 1-Ethyl-4-methoxybenzene under optimal condition (Table 2, Entry 1).

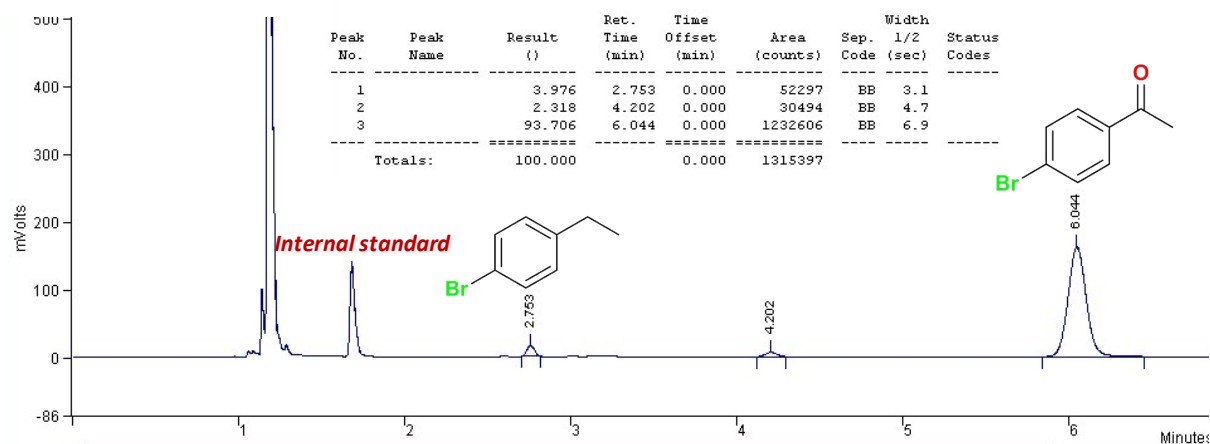

Figure S-32. GC chromatogram for Oxidation of 1-Bromo-4-ethylbenzene under optimal condition (Table 2, Entry 2).

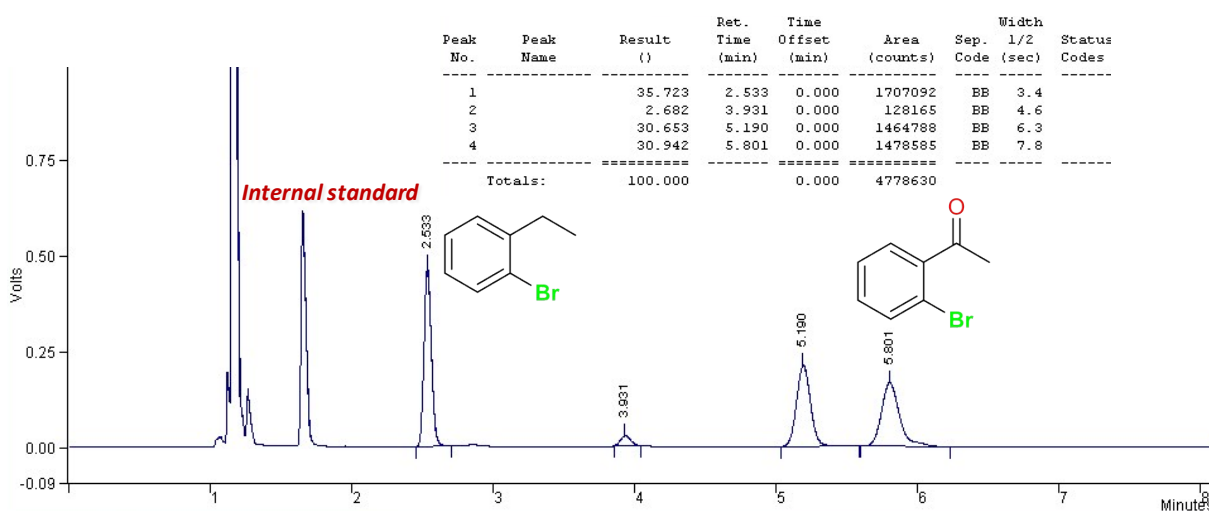

Figure S-33. GC chromatogram for Oxidation of 1-Bromo-2-ethylbenzene under optimal condition (Table 2, Entry 3).

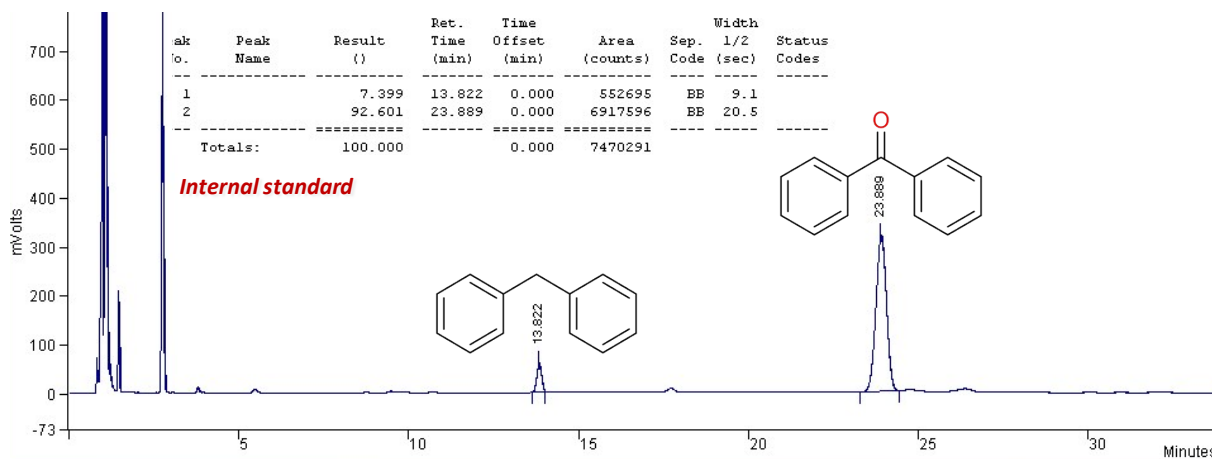

Figure S-34. GC chromatogram for Oxidation of Diphenylmethanol under optimal condition (Table 2, Entry 4).

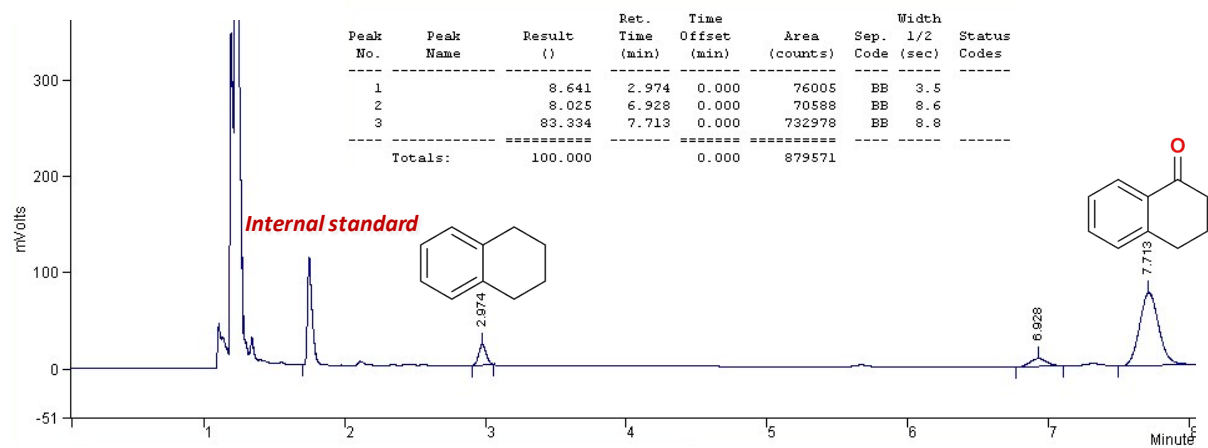

Figure S-35. GC chromatogram for Oxidation of Tetralin under optimal condition (Table 2, Entry 5).

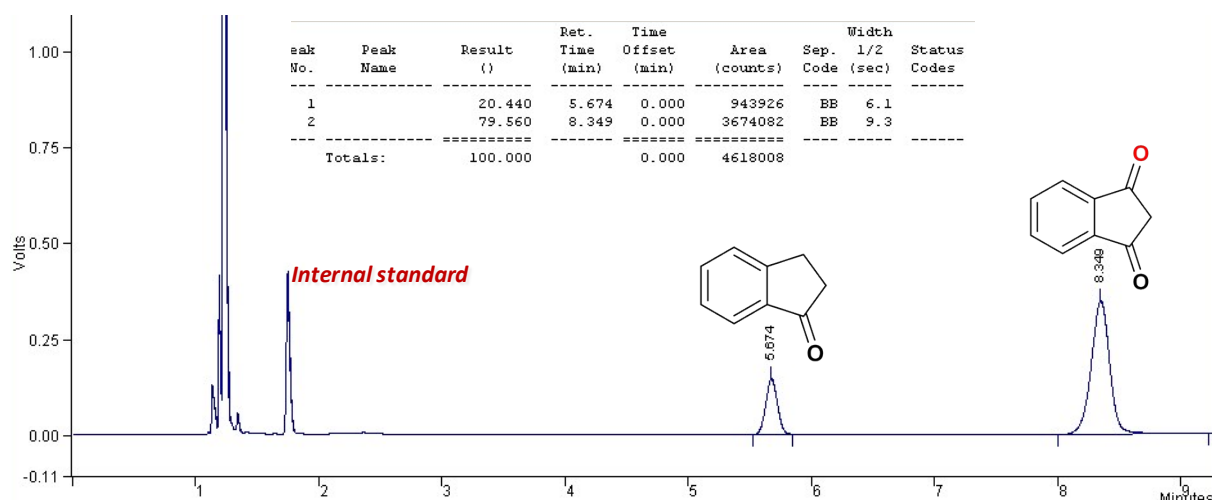

Figure S-36. GC chromatogram for Oxidation of 1-Indanone under optimal condition (Table 2, Entry 6).

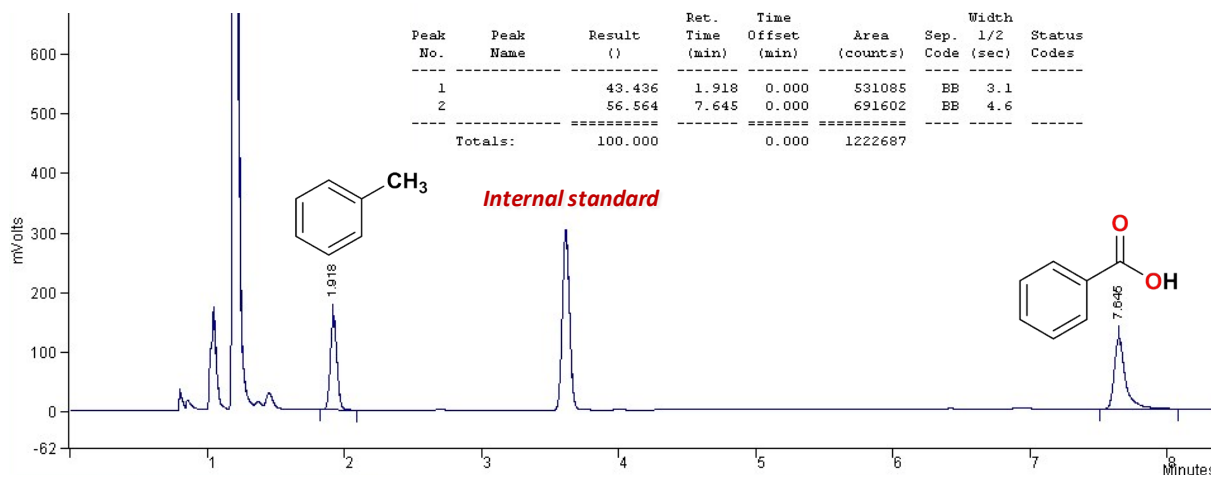

Figure S-37. GC chromatogram for Oxidation of Toluene under optimal condition (Table 2, Entry 7).

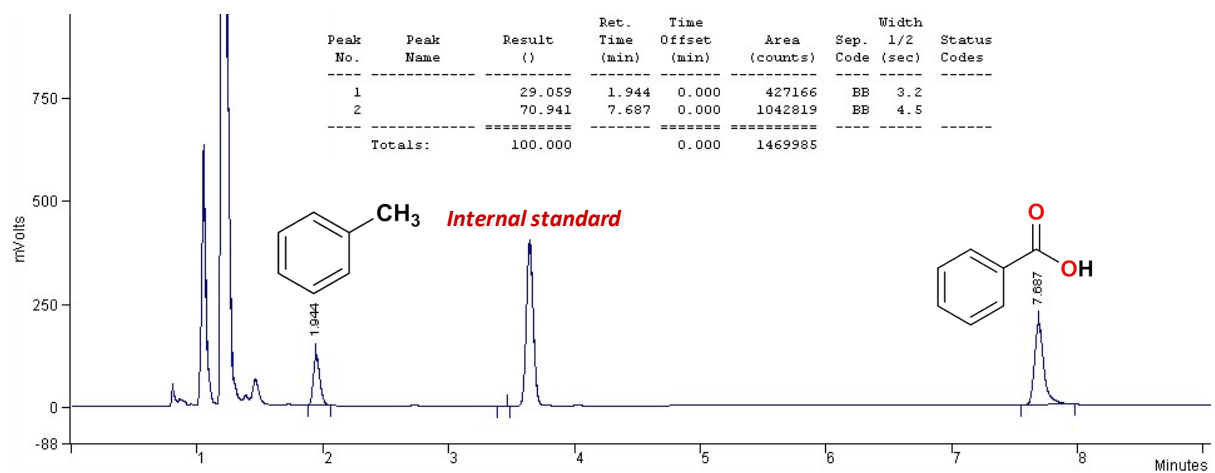

Figure S-38. GC chromatogram for Oxidation of Toluene under optimal condition (Table 2, Entry 8).

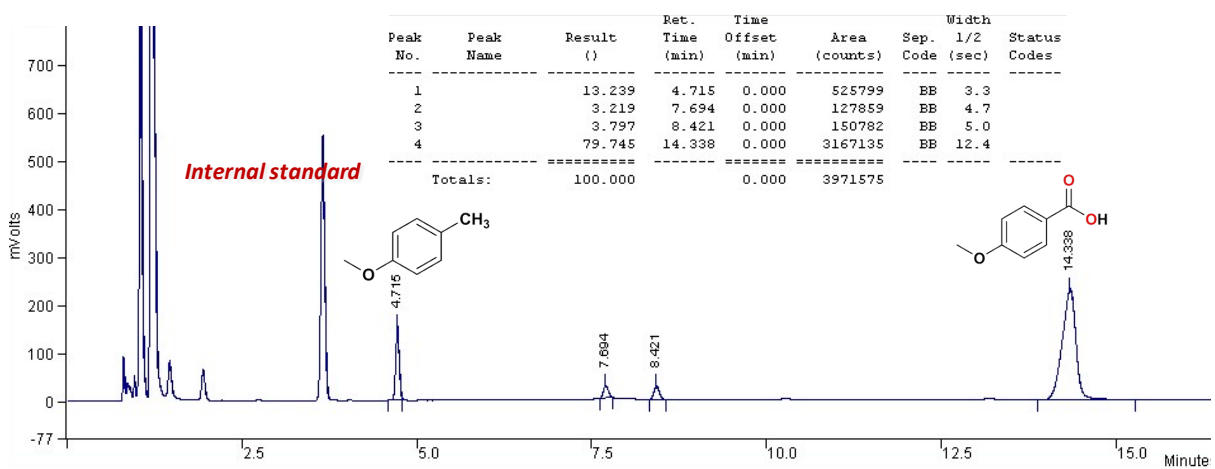

Figure S-39. GC chromatogram for Oxidation of 4-methoxytoluene under optimal condition (Table 2, Entry 9).



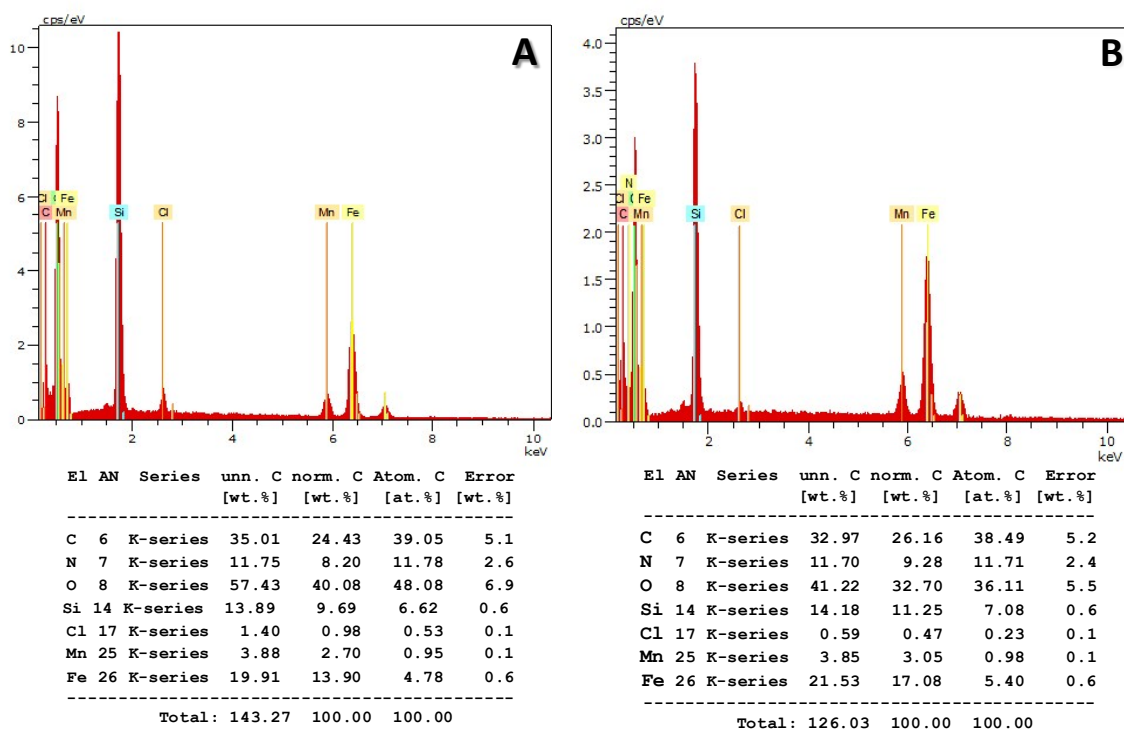

Figure S-40. EDX spectra and elemental composition of the pristine (A) and of recovered catalysts (B).

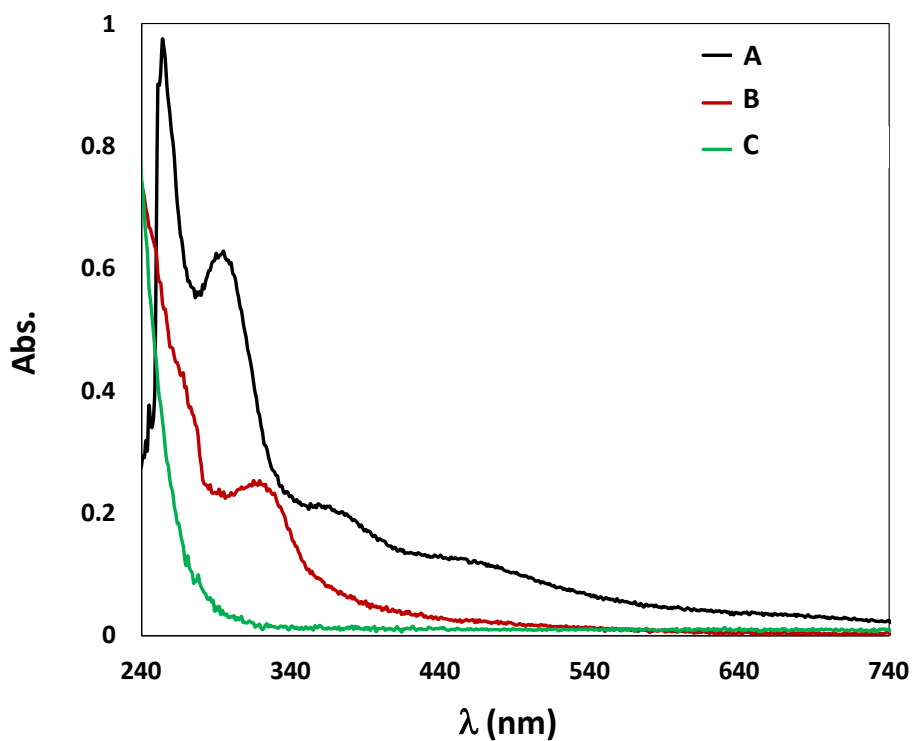

Figure S-41. Electronic absorption spectra of (A) the fresh reaction mixture in the presence of  $\text{MnL}^{\text{GOC}}$  as homogeneous catalyst, (B) an hour after beginning the reaction and (C)  $\text{MnCl}_2 \cdot 4\text{H}_2\text{O}$ .

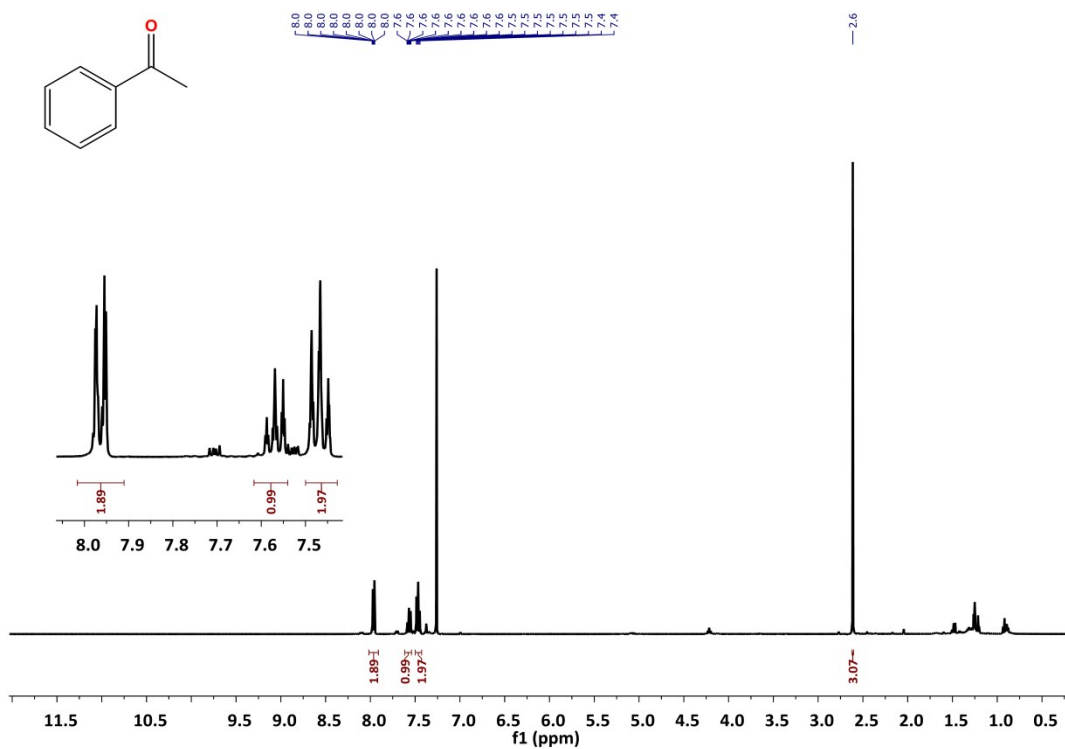

Figure S-42.  $^1\text{H}$  NMR spectrum ( $\text{CDCl}_3$ ) for main product in oxidation reaction of ethylbenzene.

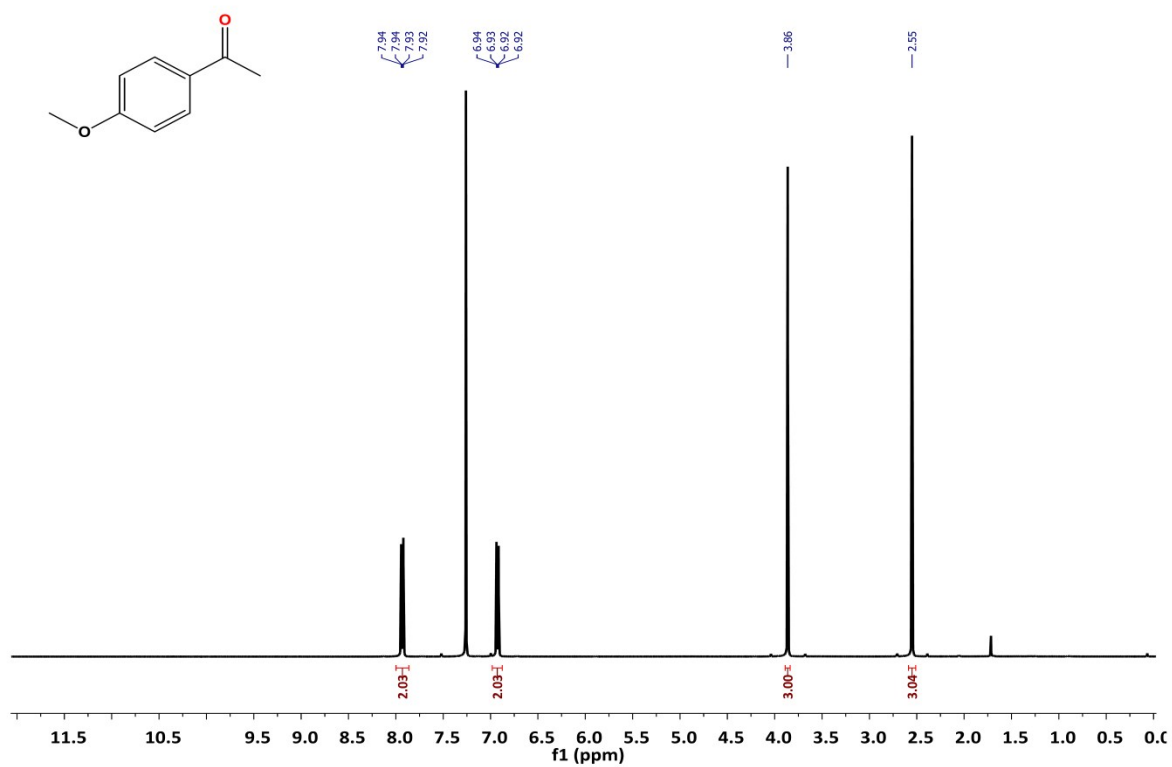

Figure S-43.  $^1\text{H}$  NMR spectrum ( $\text{CDCl}_3$ ) for main product in oxidation reaction of 1-Ethyl-4-methoxybenzene.

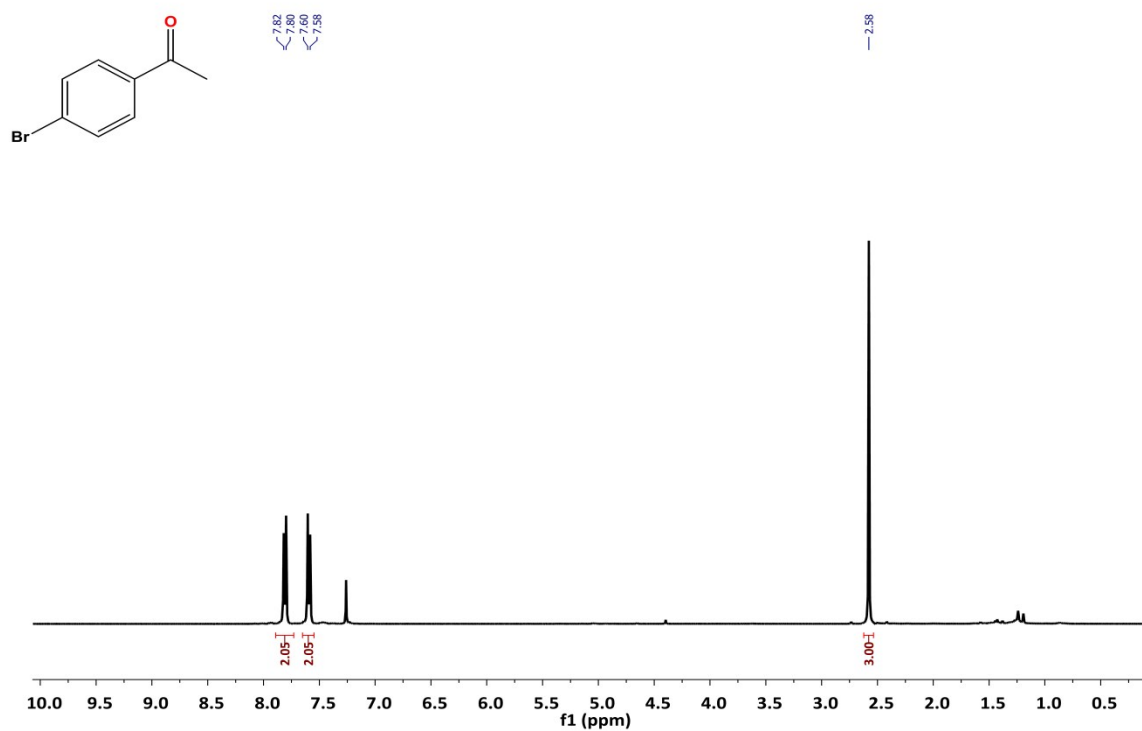

Figure S-44.  $^1\text{H}$  NMR spectrum ( $\text{CDCl}_3$ ) for main product in oxidation reaction of 1-Bromo-4-ethylbenzene.

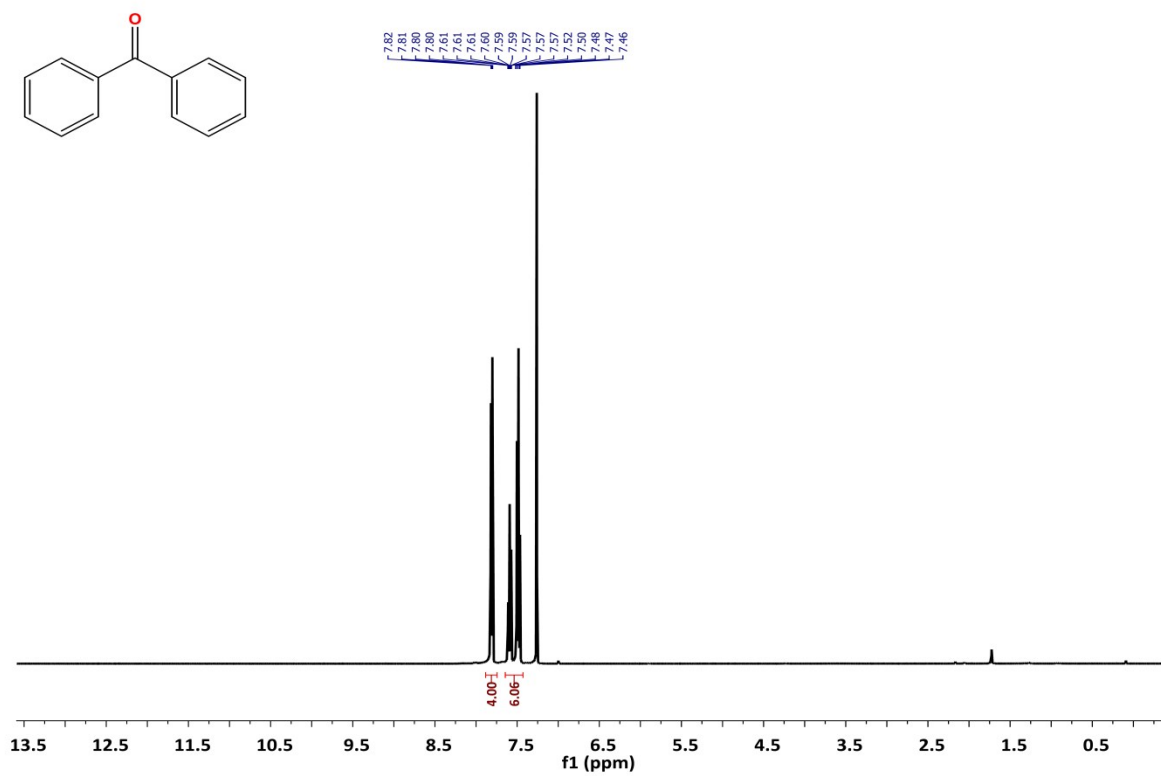

Figure S-45.  $^1\text{H}$  NMR spectrum ( $\text{CDCl}_3$ ) for main product in oxidation reaction of Diphenylmethanol.

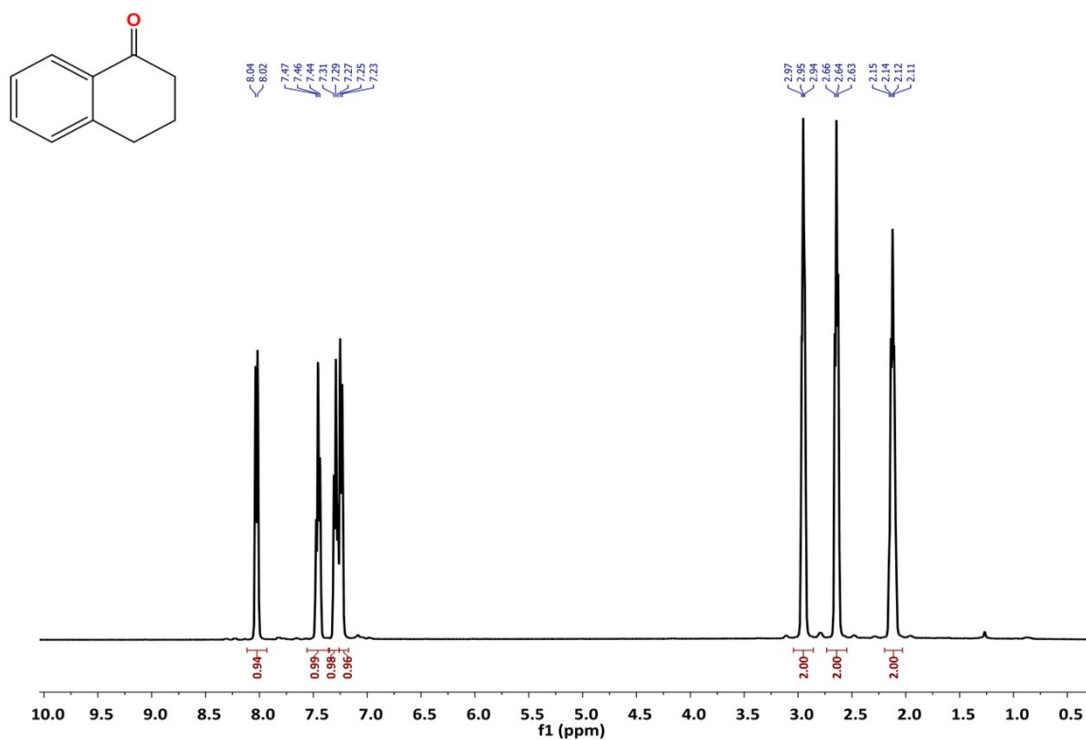

Figure S-46.  $^1\text{H}$  NMR spectrum ( $\text{CDCl}_3$ ) for main product in oxidation reaction of Tetralin.

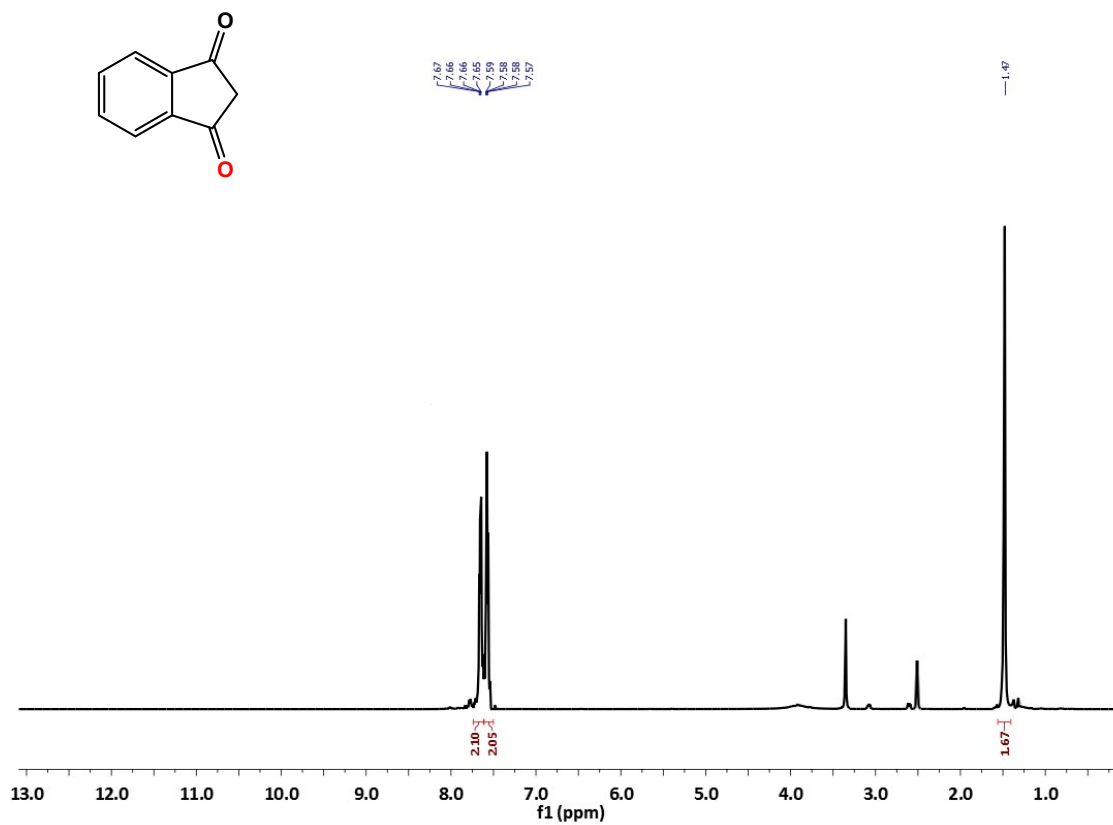

Figure S-47.  $^1\text{H}$  NMR spectrum ( $\text{DMSO-d}_6$ ) for main product in oxidation reaction of 1-Indanone.

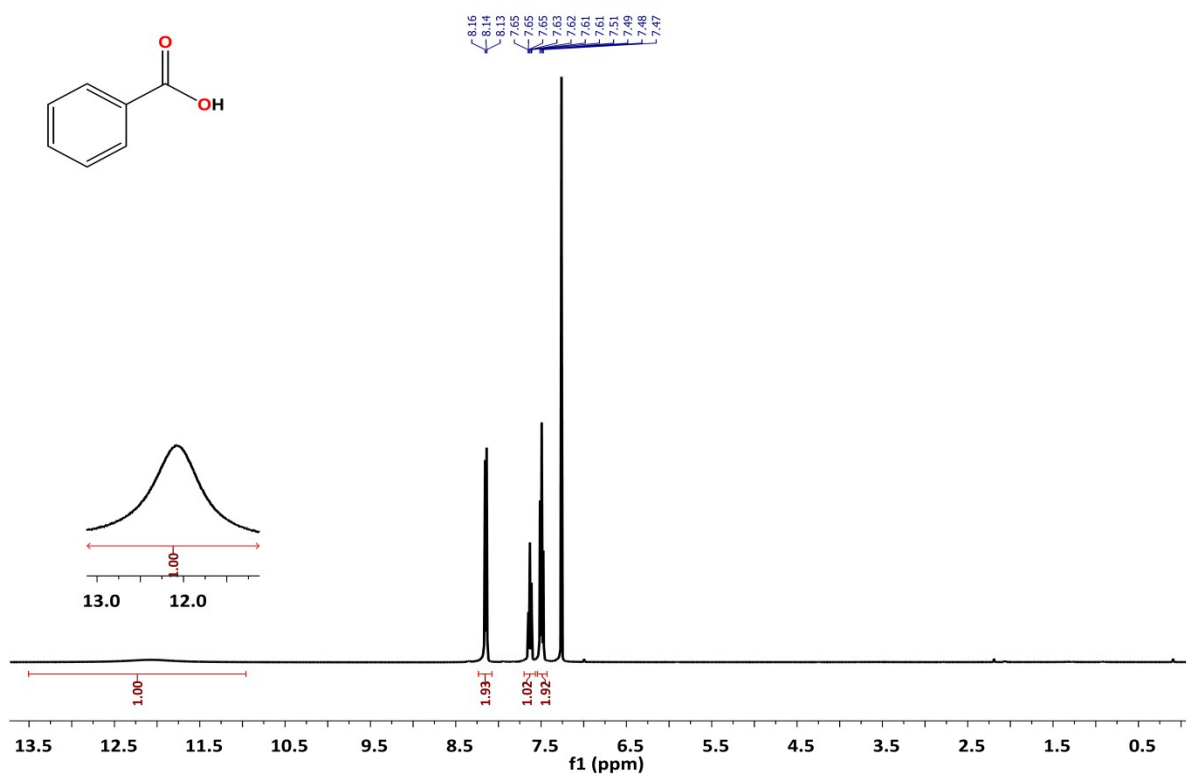

Figure S-48.  $^1\text{H}$  NMR spectrum ( $\text{CDCl}_3$ ) for main product in oxidation reaction of Toluene.

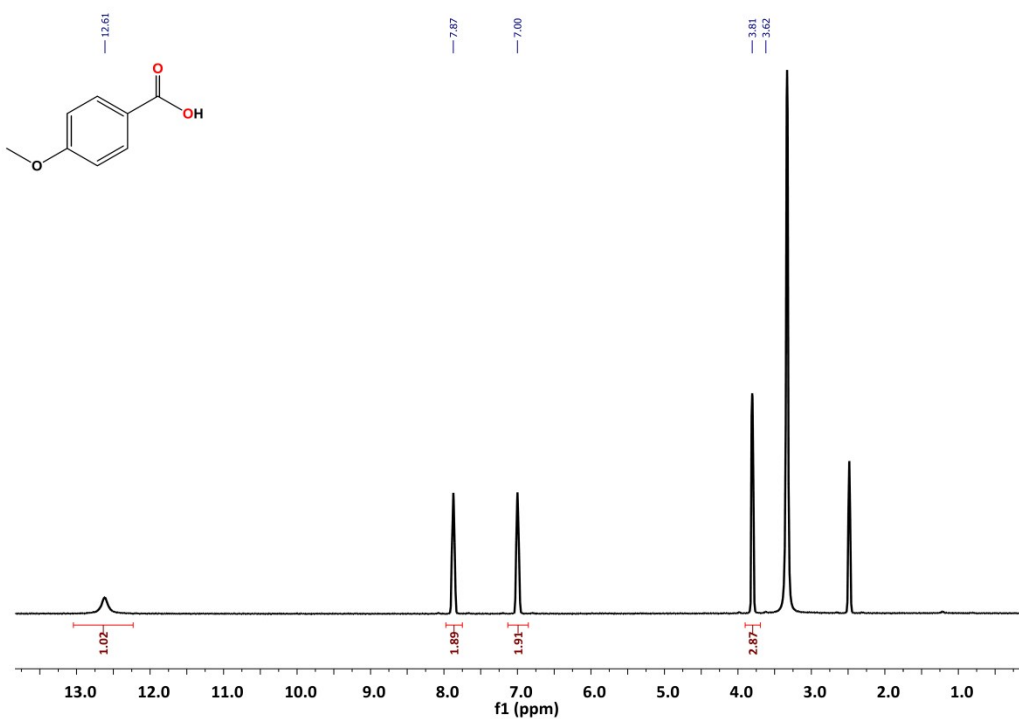

Figure S-49.  $^1\text{H}$  NMR spectrum ( $\text{DMSO-d}_6$ ) for main product in oxidation reaction of 4-methoxytoluene.
